# Supplementary material for: Multiple barriers for micropollutants in nutrient recovery from centrate – combining membrane bioreactor and electrodialysis
Source: Royal Society of Chemistry journal article supplement (doi:10.1039/d4ew00063c), 2024-01-01
Supplement: d4ew00063c1.pdf [file d4ew00063c1.pdf]

# **Supporting Information: Multiple barriers for micropollutants in nutrient recovery from centrate - combining membrane bioreactor and electro dialysis**

Paul Genz <sup>a</sup>, Anna Hendrike Hofmann<sup>b</sup>, Victor Takazi Katayama<sup>b</sup>, Thorsten  
Reemtsma <sup>a, c\*</sup>

<sup>a</sup> Helmholtz-Centre for Environmental Research – UFZ, Department of Analytical  
Chemistry, Permoserstrasse 15, 04318 Leipzig, Germany

<sup>b</sup> Fraunhofer UMSICHT, Department of Environment and Resources, Osterfelder Straße  
3, 46047 Oberhausen, Germany

<sup>c</sup> University of Leipzig, Institute for Analytical Chemistry, Linnéstrasse 3, 04103, Leipzig,  
Germany

\*Corresponding author: [thorsten.reemtsma@ufz.de](mailto:thorsten.reemtsma@ufz.de)

## **Key words:**

reject water, nitrogen recovery, trace pollutants, heavy metals, wastewater, nutrient  
center

## **Chemicals and Analytical Standards**

Ultrapure water, generated using a Merck MilliQ Integral 5 System (Merck, Darmstadt, Germany), served as the base for diluting all samples, including those for salts, nutrients, and metals analysis. Furthermore, it was used as the eluent A in the LC-MS/MS gradient. UPLC-grade methanol (BioSolve, Valkenswaard, Netherlands) was employed as eluent B in the mobile phase.

For LC-MS/MS analysis of micropollutants, analytical standard stock solutions were prepared either in methanol or a water/methanol mixture, and then stored at -20 °C until calibration standards were created. In the case of ICP-MS analysis, a blend of analytical standards (Spex 1, Spex 2a, Spex 3, Spex 4; SpexCertiprep, Metuchen, USA) & Merck VI (Merck, Darmstadt, Germany) was formulated for calibration in an aqueous solution containing 1% HNO<sub>3</sub> (HNO<sub>3</sub> (60%), Ultrapur, Merck, Darmstadt, Germany). Individual-element analytical standards for elemental analysis via ICP-OES were procured from Merck (Darmstadt, Germany) as well.

## Tables

Tab. SI 1: Recovery of analytes for Sartorius RC25 filters used in this study. Each matrix was spiked with 10  $\mu\text{L}$  of 1  $\text{ng}/\mu\text{L}$  mixed reference standard and filtered through the RC25

|                         | Recovery in centrate | Recovery in tap water |
|-------------------------|----------------------|-----------------------|
| 4-Acetoaminoantipyrine  | 97.5( $\pm$ 1.8)%    | 105.7( $\pm$ 7.6)%    |
| 4/5-Methylbenzotriazole | 92.6( $\pm$ 2.57)%   | 116.7( $\pm$ 9.32)%   |
| Acesulfame              | 100.4( $\pm$ 2.31)%  | 104.9( $\pm$ 6.75)%   |
| Acetaminophen           | 100.6( $\pm$ 3.51)%  | 102.1( $\pm$ 8.23)%   |
| Benzotriazole           | 96.9( $\pm$ 4.44)%   | n.d.%                 |
| Carbamazepine           | 95.4( $\pm$ 2.98)%   | 106( $\pm$ 9.07)%     |
| Candesartan             | n.d.                 | n.d.                  |
| Diclofenac              | 40.3( $\pm$ 2.12)%   | 107.3( $\pm$ 11.3)%   |
| Ep-Carbamazepine        | 111.6( $\pm$ 3.88)%  | 106.4( $\pm$ 8.8)%    |
| Gabapentin              | 101.6( $\pm$ 3.26)%  | n.d.%                 |
| Gabapentin-Lactam       | 97.9( $\pm$ 1.83)%   | 106.2( $\pm$ 8.42)%   |
| Ibuprofen               | 74.2( $\pm$ 2.87)%   | 106.2( $\pm$ 8.73)%   |
| Lamotrigine             | 95.6( $\pm$ 1.74)%   | 101.3( $\pm$ 9.15)%   |

|                     |              |                |
|---------------------|--------------|----------------|
| Lidocaine           | 96.4(±3.41)% | 95(±10.08)%    |
| Metformin           | 97.6(±1.41)% | 104.5(±6.77)%  |
| Metoprolol          | 96(±1.77)%   | 105.6(±8.54)%  |
| Metoprolol Acid     | 99.3(±2.78)% | 106.9(±9.63)%  |
| Oxipurinol          | 94.2(±3.87)% | 105.4(±8.17)%  |
| tDiOH-Carbamazepine | 93.8(±3.35)% | n.d.%          |
| Tramadol            | 98.2(±2.48)% | 106.2(±8.35)%  |
| Valsartan           | 78.7(±2.33)% | n.d.%          |
| Valsartan Acid      | 92.7(±1.69)% | 103.3(±11.38)% |

*Tab. SI 2 Recovery of inorganic compounds for Sartorius RC25 filters used in this study. Each matrix was spiked with 10  $\mu$ L of 1 ng/ $\mu$ L mixed reference standard and filtered through the RC25 filter. The filtered spiked matrix was compared against a reference that was spiked and centrifuged (15.000 rpm) for 15min. Recovery experiments were performed in triplicate.*

|           | <b>Recovery in %</b>   |
|-----------|------------------------|
|           | <b>ultrapure water</b> |
| <b>Al</b> | 131.2                  |
| <b>Cr</b> | 97( $\pm$ 5.25)        |
| <b>Co</b> | 96.4( $\pm$ 6.3)       |
| <b>Ni</b> | 94.4( $\pm$ 4.81)      |
| <b>Cu</b> | 98.4( $\pm$ 0)         |
| <b>Zn</b> | 100.9( $\pm$ 4.02)     |
| <b>As</b> | 97( $\pm$ 5.25)        |
| <b>Cd</b> | 89.4( $\pm$ 1.89)      |
| <b>Pb</b> | 90.9( $\pm$ 0)         |

*Tab. SI 3: Gradient of liquid chromatographic separation method*

|                    | <b>Portion in %</b> |                 |                            |
|--------------------|---------------------|-----------------|----------------------------|
| <b>Time in min</b> | <b>A (H2O)</b>      | <b>B (MeOH)</b> | <b>Flow Rate in mL/min</b> |
| 0.0                | 90                  | 10              | 0.3                        |
| 0.8                | 90                  | 10              | 0.3                        |
| 7.5                | 45                  | 55              | 0.3                        |
| 21.0               | 5                   | 95              | 0.3                        |
| 28.0               | 5                   | 95              | 0.3                        |
| 29.1               | 90                  | 10              | 0.3                        |
| 31.0               | 90                  | 10              | 0.3                        |

Tab. SI 4: MS-Parameters for all analytes, including isotopically-labelled internal standards.

|                                           | ESI-<br>Mod<br>e | Q1 in<br>u | Q2 in<br>u | RT in<br>min | DP in<br>V | EP in<br>V | CE in<br>eV | CXP in<br>V |
|-------------------------------------------|------------------|------------|------------|--------------|------------|------------|-------------|-------------|
| <b>Benzotriazole</b>                      | +                | 120,01     | 65,00      | 7,54         | 126        | 10         | 29          | 10          |
|                                           |                  | 120,01     | 91,90      | 7,54         | 126        | 10         | 23          | 12          |
| <b>Benzotriazole-d4</b>                   | +                | 124,01     | 68,00      | 7,45         | 51         | 10         | 29          | 10          |
|                                           |                  | 124,01     | 69,10      | 7,45         | 51         | 10         | 33          | 12          |
| <b>Metformin</b>                          | +                | 130,06     | 59,90      | 0,92         | 66         | 10         | 17          | 6           |
|                                           |                  | 130,06     | 70,90      | 0,92         | 66         | 10         | 29          | 14          |
| <b>4/5-<br/>Methylbenzotriazole</b>       | +                | 134,10     | 77,00      | 8,90         | 71         | 10         | 31          | 6           |
|                                           |                  | 134,10     | 78,90      | 8,90         | 71         | 10         | 29          | 10          |
| <b>5-<br/>Methylbenzotriazole-<br/>d6</b> | +                | 140,06     | 80,90      | 8,90         | 141        | 10         | 35          | 12          |
|                                           |                  | 140,10     | 84,90      | 8,90         | 71         | 10         | 29          | 10          |
| <b>Acetaminophen</b>                      | +                | 151,99     | 110,10     | 5,50         | 106        | 10         | 21          | 10          |
|                                           |                  | 151,99     | 65,10      | 5,50         | 106        | 10         | 41          | 8           |

|                               |   |        |        |       |     |    |    |    |
|-------------------------------|---|--------|--------|-------|-----|----|----|----|
| <b>Gabapentin-Lactam</b>      | + | 153,98 | 95,10  | 9,80  | 131 | 10 | 31 | 10 |
|                               |   | 153,98 | 93,10  | 9,80  | 131 | 10 | 35 | 8  |
| <b>Gabapentin-Lactam-d6</b>   | + | 160,08 | 101,10 | 9,80  | 126 | 10 | 31 | 12 |
|                               |   | 160,08 | 100,00 | 9,80  | 126 | 10 | 29 | 12 |
| <b>Gabapentin</b>             | + | 172,01 | 154,10 | 4,92  | 36  | 10 | 19 | 10 |
|                               |   | 172,01 | 137,00 | 4,92  | 36  | 10 | 21 | 6  |
| <b>Gabapentin-d4</b>          | + | 176,06 | 158,10 | 4,85  | 71  | 10 | 19 | 18 |
|                               |   | 176,06 | 139,00 | 4,85  | 71  | 10 | 23 | 14 |
| <b>Lidocaine</b>              | + | 235,10 | 86,10  | 5,36  | 76  | 10 | 25 | 8  |
|                               |   | 235,10 | 57,90  | 5,36  | 76  | 10 | 47 | 8  |
| <b>Carbamazepine</b>          | + | 237,04 | 194,10 | 10,90 | 106 | 10 | 25 | 6  |
|                               |   | 237,04 | 193,10 | 10,90 | 106 | 10 | 47 | 8  |
| <b>Lidocaine-d10</b>          | + | 245,12 | 96,10  | 5,29  | 76  | 10 | 25 | 12 |
|                               |   | 245,12 | 64,10  | 5,29  | 76  | 10 | 57 | 6  |
| <b>4-Acetoaminoantipyrine</b> | + | 246,07 | 228,10 | 6,79  | 76  | 10 | 19 | 30 |
|                               |   | 246,07 | 83,10  | 6,79  | 76  | 10 | 45 | 10 |
| <b>Carbamazepine-d10</b>      | + | 247,02 | 204,10 | 10,77 | 29  | 10 | 29 | 10 |



|                            |   |        |        |       |     |     |     |     |
|----------------------------|---|--------|--------|-------|-----|-----|-----|-----|
|                            |   | 247,02 | 202,00 | 10,77 | 56  | 10  | 47  | 10  |
| <b>Ep-Carbamazepine</b>    | + | 253,00 | 180,10 | 9,42  | 71  | 10  | 43  | 16  |
|                            |   | 253,00 | 210,10 | 9,42  | 71  | 10  | 21  | 14  |
| <b>Lamotrigine</b>         | + | 255,99 | 211,00 | 6,38  | 91  | 10  | 39  | 4   |
|                            |   | 255,99 | 109,00 | 6,38  | 91  | 10  | 63  | 6   |
| <b>Tramadol</b>            | + | 264,91 | 58,10  | 6,14  | 86  | 10  | 49  | 12  |
|                            |   | 264,91 | 59,20  | 6,14  | 86  | 10  | 41  | 6   |
| <b>Valsartan Acid</b>      | + | 267,00 | 151,00 | 11,08 | 71  | 10  | 55  | 18  |
|                            |   | 267,00 | 206,00 | 11,08 | 71  | 10  | 25  | 20  |
| <b>Metoprolol Acid</b>     | + | 268,07 | 145,10 | 5,27  | 106 | 10  | 35  | 12  |
|                            |   | 268,07 | 226,10 | 5,27  | 106 | 10  | 23  | 28  |
| <b>Metoprolol</b>          | + | 268,12 | 116,10 | 6,29  | 81  | 10  | 25  | 6   |
|                            |   | 268,12 | 191,10 | 6,29  | 81  | 10  | 25  | 4   |
| <b>tDiOH Carbamazepine</b> | + | 271,03 | 253,00 | 8,96  | 26  | 10  | 11  | 16  |
|                            |   | 271,04 | 180,10 | 8,96  | 86  | 10  | 43  | 16  |
| <b>Metoprolol Acid-d5</b>  | + | 273,10 | 196,00 | 5,21  | 26  | 10  | 27  | 10  |
|                            |   | 273,10 | 150,10 | 5,21  | 26  | 10  | 35  | 16  |
| <b>Acesulfame</b>          | - | 161,90 | 81,90  | 4,92  | -50 | -10 | -20 | -13 |

|                      |   |        |        |       |     |     |     |     |
|----------------------|---|--------|--------|-------|-----|-----|-----|-----|
|                      |   | 161,90 | 77,90  | 4,92  | -50 | -10 | -40 | -13 |
| <b>Acesulfame-d4</b> | - | 165,87 | 86,10  | 4,87  | -25 | -10 | -20 | -7  |
|                      |   | 165,87 | 78,00  | 4,87  | -25 | -10 | -46 | -3  |
| <b>Ibuprofen</b>     | - | 205,08 | 161,10 | 17,78 | -80 | -10 | -10 | -13 |
|                      |   | 205,08 | 159,10 | 17,78 | -80 | -10 | -10 | -13 |
| <b>Ibuprofen-d3</b>  | - | 208,04 | 164,10 | 17,73 | -50 | -10 | -10 | -11 |
|                      |   | 208,04 | 161,10 | 17,73 | -50 | -10 | -10 | -15 |
| <b>Diclofenac</b>    | - | 294,00 | 250,00 | 17,41 | -40 | -10 | -16 | -13 |
|                      |   | 295,88 | 252,00 | 17,41 | -40 | -10 | -16 | -11 |
| <b>Diclofenac-d4</b> | - | 297,88 | 254,10 | 17,34 | -50 | -10 | -18 | -13 |
|                      |   | 298,85 | 255,00 | 17,34 | -45 | -10 | -20 | -13 |
| <b>Valsartan</b>     | - | 434,17 | 350,00 | 16,72 | -40 | -10 | -26 | -29 |
|                      |   | 434,17 | 178,80 | 16,72 | -40 | -10 | -34 | -23 |

*Tab. SI 5 Overview of isotope labelled standards spiked into the samples for the use as internal standard. 10 µL were spiked into every 1 mL of sample volume. The target concentration for all internal standards was 10 µg/L.*

| <b>Isotopically labelled Standard</b> | <b>Used for matrix correction of ...</b> |
|---------------------------------------|------------------------------------------|
| Benzotriazole-d4                      | Benzotriazole                            |
| Metformin-d6                          | Metformin                                |
| 5-Methylbenzotriazole-d6              | 4/5-Methylbenzotriazole                  |
| Lidocaine-d10                         | Lidocaine                                |
| Carbamazepine-d10                     | Carbamazepine                            |
| Lamotrigine-13C-15N                   | Lamotrigine                              |
| Valsartan Acid-d4                     | Valsartan Acid                           |
| Metoprolol Acid-d5                    | Candesartan                              |
| Acesulfame-d4                         | Acesulfame                               |
| Ibuprofen-d3                          | Ibuprofen                                |
| Diclofenac-d4                         | Diclofenac                               |

Tab. SI 6: Overview of relevant physical chemical properties for analyzed micropollutants. Prediction of compounds properties computed by ChemAxon.

|                         | <b>CAS</b>  | <b>Mass</b> | <b>pK<sub>a1</sub></b> | <b>pK<sub>b1</sub></b> | <b>Isoelectric Point</b> | <b>logD (pH 5.5)</b> | <b>logD (pH 8.0)</b> |
|-------------------------|-------------|-------------|------------------------|------------------------|--------------------------|----------------------|----------------------|
| 4-Acetoaminoantipyrine  | 83-15-8     | 245,282     | 12,5                   | -0,8                   | 5,9                      | 0,2                  | 0,2                  |
| 4/5-Methylbenzotriazole | 29878-31-7  | 133,154     | 9,3                    | 0,5                    | 4,9                      | 1,8                  | 1,8                  |
| Acesulfame              | 33665-90-6  | 163,15      | 3,0                    | -6,0                   | 0,0                      | -1,5                 | -1,5                 |
| Acetaminophen           | 103-90-2    | 151,165     | 9,5                    | -4,4                   | 0,0                      | 0,9                  | 0,9                  |
| Benzotriazole           | 95-14-7     | 119,127     | 8,6                    | 0,6                    | 4,6                      | 1,3                  | 1,2                  |
| Carbamazepine           | 298-46-4    | 236,274     | 16,0                   | -3,8                   | 0,0                      | 2,8                  | 2,8                  |
| Candesartan             | 139481-59-7 | 440,5       | 3,5                    | 1,5                    | 2,5                      | 3,1                  | 0,3                  |
| Diclofenac              | 15307-86-5  | 296,15      | 4,0                    | -2,1                   | 0,0                      | 2,7                  | 0,9                  |
| Ep-Carbamazepine        | 36507-30-9  | 252,273     | 5,1                    | 3,7                    | 9,4                      | 2,2                  | 0,0                  |

|                     |             |         |      |      |      |      |      |
|---------------------|-------------|---------|------|------|------|------|------|
| Gabapentin          | 60142-96-3  | 171,24  | 4,6  | 9,9  | 7,4  | -1,3 | -1,3 |
| Gabapentin-Lactam   | 64744-50-9  | 153,225 | 14,9 | -1,2 | 6,9  | 1,0  | 1,0  |
| Ibuprofen           | 15687-27-1  | 206,285 | 4,9  | 0    | 0,0  | 3,1  | 0,8  |
| Lamotrigine         | 84057-84-1  | 256,09  | 15,0 | 5,9  | 10,9 | 1,4  | 1,9  |
| Lidocaine           | 137-58-6    | 234,343 | 13,8 | 7,8  | 10,8 | 0,6  | 2,6  |
| Metformin           | 657-24-9    | 129,167 | 19,2 | 12,3 | 0,0  | -5,7 | -5,4 |
| Metoprolol          | 51384-51-1  | 267,369 | 14,1 | 9,7  | 11,9 | -1,4 | 0,1  |
| Metoprolol Acid     | 56392-14-4  | 267,325 | 3,5  | 9,7  | 6,8  | -1,2 | -1,2 |
| Oxipurinol          | 2465-59-0   | 152,11  | 6,25 | 2,1  | 7,65 | -1,7 | -3,2 |
| tDiOH-Carbamazepine | 176486-10-5 | 270,288 | 12,8 | -3,6 | 0,0  | 0,8  | 0,8  |
| Tramadol            | 123154-38-1 | 263,381 | 13,8 | 9,2  | 11,5 | -0,9 | 1,2  |
| Valsartan           | 137862-53-4 | 435,528 | 4,4  | -0,6 | 1,9  | 4,0  | 0,5  |
| Valsartan Acid      | -           | 266,26  | 4,0  | -1,4 | 1,3  | 1,5  | -1,7 |

Tab. SI 7 Mean concentration of organic micropollutants during phase I and II in all sampling points.

|                                | Centrate Feed, |           | MBR Permeate, |           | ED Concentrate, |          |
|--------------------------------|----------------|-----------|---------------|-----------|-----------------|----------|
|                                | µg/L           |           | µg/L          |           | µg/L            |          |
|                                | Phase I        | Phase II  | Phase I       | Phase II  | Phase I         | Phase II |
| <b>4-Acetoaminoantipyrine</b>  | 12.45±4.5      | 10.13±0.9 | 3.21±1.4      | 2.23±1.4  | <LOD            | <LOD     |
| <b>4/5-Methylbenzotriazole</b> | 39.31±21.8     | 4.29±0.2  | 2.74±10       | 2.19±2.1  | 1.13±1.9        | 0.8±0.4  |
| <b>Acesulfame</b>              | 10.14±4.3      | 4.52±2.4  | 0.15±0.6      | 1.2±0.6   | 0.3±0.7         | 0.95±0.5 |
| <b>Acetaminophen</b>           | <LOD           | 1.18±1.6  | <LOD          | <LOD      | <LOD            | <LOD     |
| <b>Acetylsulfamethoxazole</b>  | <LOD           | <LOD      | <LOD          | <LOD      | <LOD            | <LOD     |
| <b>Benzotriazole</b>           | 128.93±72      | 8.46±0.9  | 2.81±15.3     | 4.96±3    | 2.66±9.7        | 2.07±1   |
| <b>Candesartan</b>             | NA             | NA        | NA            | 14.04±0.6 | <LOD            | <LOD     |
| <b>Carbamazepine</b>           | 7.2±3.5        | 5.04±0.7  | 1.88±3.7      | 5.43±2.6  | 0.06±0          | 1.58±0.7 |
| <b>Diclofenac</b>              | 12.03±5.2      | 7.31±2.1  | 1.82±1.4      | 1.85±0.9  | 0.04±0.1        | 0.83±1.5 |
| <b>Ep-Carbamazepine</b>        | 0.27±0.9       | <LOD      | 1.34±0.7      | 2.35±2    | <LOD            | <LOD     |
| <b>Gabapentin</b>              | 9.17±4.7       | 8.73±0.8  | 4.06±5.4      | 5.03±1.5  | 0.38±0.7        | 1.3±1.1  |
| <b>Gabapentin-Lactam</b>       | 1.13±0.6       | 2.05±0.3  | 1.22±0.8      | 2.49±1.6  | 0.12±0.1        | <LOD     |
| <b>Hydrochlorothiazide</b>     | n.d.           | <LOD      | n.d.          | 0.36±0.7  | n.d.            | <LOD     |
| <b>Ibuprofen</b>               | 25.48±11.1     | 14.39±1.9 | <LOD          | <LOD      | <LOD            | <LOD     |
| <b>Lamotrigine</b>             | 4.59±1.3       | 4.68±1.1  | 2.46±1.3      | 5.32±1.2  | 0.5±0.5         | 1.21±1.3 |
| <b>Lidocaine</b>               | 0.89±0.5       | 0.8±0.1   | 0.6±0.4       | 0.79±0.4  | 0.59±0.3        | 2.34±1.6 |
| <b>Metformin</b>               | 1.09±0.5       | <LOD      | <LOD          | <LOD      | 1.27±0.3        | 5.78±2.2 |
| <b>Metoprolol</b>              | 11.59±2.8      | 9.1±0.9   | 3.98±1.8      | 3.76±2.2  | 1±0.7           | 4.64±2.3 |
| <b>Metoprolol Acid</b>         | 12.42±2.4      | 11.46±1.4 | 1.1±1.1       | 0.94±1.1  | 0.3±0.2         | <LOD     |
| <b>Oxipurinol</b>              | 4.03±176.4     | 2.81±1.9  | <LOD          | 4.54±1.7  | <LOD            | 0.19±0.6 |
| <b>Sulfamethoxazole</b>        | <LOD           | <LOD      | <LOD          | <LOD      | <LOD            | <LOD     |
| <b>Tramadol</b>                | 2.4±1          | 2.27±0.1  | 2.01±0.9      | 2.57±2.3  | <LOD            | <LOD     |

|                            |           |           |           |           |           |          |
|----------------------------|-----------|-----------|-----------|-----------|-----------|----------|
| <b>Valsartan</b>           | 33.99±5.7 | 12.69±0.6 | 0.95±0.8  | 0.98±0.4  | <LOD      | <LOD     |
| <b>Valsartan Acid</b>      | 1.23±0.1  | 1.7±0.6   | 11.19±2.2 | 17.12±9.3 | 13.75±1.9 | 6.45±4.4 |
| <b>tDiOH-Carbamazepine</b> | 2.12±0.4  | 2.38±0.5  | 1.59±0.4  | 3.4±1.6   | <LOD      | <LOD     |

*Tab.SI 8: Median concentration of nitrogen species in the MBR permeate.*

|                                | <b>Phase I</b> | <b>Phase II</b> |
|--------------------------------|----------------|-----------------|
| <b>NH<sub>4</sub>-N [mg/L]</b> | 4.2±2.9        | 0.8±0.5         |
| <b>NO<sub>2</sub>-N [mg/L]</b> | 1.0±1.0        | 0.1±0.0         |
| <b>NO<sub>3</sub>-N [mg/L]</b> | 863.2±54.0     | 798.7±100.3     |
| <b>TN [mg/L]</b>               | 897.3±61.4     | 673.5±51.2      |



Tab. SI 9: Mean elimination of organic micropollutants over entire study period including phase I and phase II. Column “Retention ED” refers to elimination calculated for two-stage system using initial centrate load as reference. Retention “ED (stand-alone)” refers to elimination calculated considering the MBR permeate loads as reference.

|                                     | <b>Elimination<br/>MBR</b> | <b>Retention<br/>ED</b> | <b>Total<br/>Elimination</b> | <b>Retention ED (stand-<br/>alone)</b> |
|-------------------------------------|----------------------------|-------------------------|------------------------------|----------------------------------------|
| <b>4-<br/>Acetoaminoantipyrine</b>  | 69±9%                      | 31±9.0%                 | 100±13%                      | 100±0.0%                               |
| <b>4/5-<br/>Methylbenzotriazole</b> | 33±50%                     | 64±47.0%                | 97±69%                       | 95±3.0%                                |
| <b>Acesulfame</b>                   | 86±13%                     | 5±14.0%                 | 91±19%                       | 38±100.0%                              |
| <b>Acetaminophen</b>                | 100%                       | 0%                      | 100%                         | 89%                                    |
| <b>Acetylsulfamethoxazole</b>       | -                          | -                       | -                            | -                                      |
| <b>Benzotriazole</b>                | 49±45%                     | 46±41.0%                | 95±61%                       | 91±3.0%                                |
| <b>Carbamazepine</b>                | -27±52%                    | 98±4.0%                 | 98±4%                        | 98±4.0%                                |
| <b>Diclofenac</b>                   | 77±6%                      | 22±6.0%                 | 99±8%                        | 94±9.0%                                |
| <b>Ep-Carbamazepine</b>             | -60±126%                   | 100±0.0%                | 100%                         | 100±0.0%                               |
| <b>Gabapentin</b>                   | 37±15%                     | 59±15.0%                | 96±21%                       | 94±7.0%                                |
| <b>Gabapentin-Lactam</b>            | -72±46%                    | 99±2.0%                 | 99±2%                        | 99±2.0%                                |
| <b>Hydrochlorothiazide</b>          | 1%                         | 99%                     | 100%                         | 100%                                   |
| <b>Ibuprofen</b>                    | 100%                       | -                       | -                            | -                                      |
| <b>Lamotrigine</b>                  | -10±36%                    | 97±3.0%                 | 97±3%                        | 97±3.0%                                |
| <b>Lidocaine</b>                    | -22±41%                    | 74±21.0%                | 74±21%                       | 74±21.0%                               |
| <b>Metformin</b>                    | 76±48%                     | 19±37.0%                | 95±61%                       | 78±4.0%                                |

|                            |             |          |        |          |
|----------------------------|-------------|----------|--------|----------|
| <b>Metoprolol</b>          | 58±17%      | 38±16.0% | 96±23% | 90±11.0% |
| <b>Metoprolol_Acid</b>     | 86±6%       | 13±6.0%  | 99±8%  | 98±3.0%  |
| <b>Oxipurinol</b>          | 50±60%      | 47±56.0% | 97±82% | 93±8.0%  |
| <b>Sulfamethoxazole</b>    | -           | -        | -      | -        |
| <b>Tramadol</b>            | -49±71%     | 98±2.0%  | 98±2%  | 98±2.0%  |
| <b>Valsartan</b>           | 94±3%       | 6±3.0%   | 100±4% | 100±0.0% |
| <b>Valsartan Acid</b>      | -1 070±259% | 83±6.0%  | 83±6%  | 83±6.0%  |
| <b>tDiOH-Carbamazepine</b> | -22±54%     | 100±0.0% | 100%   | 100±0.0% |

# Figures

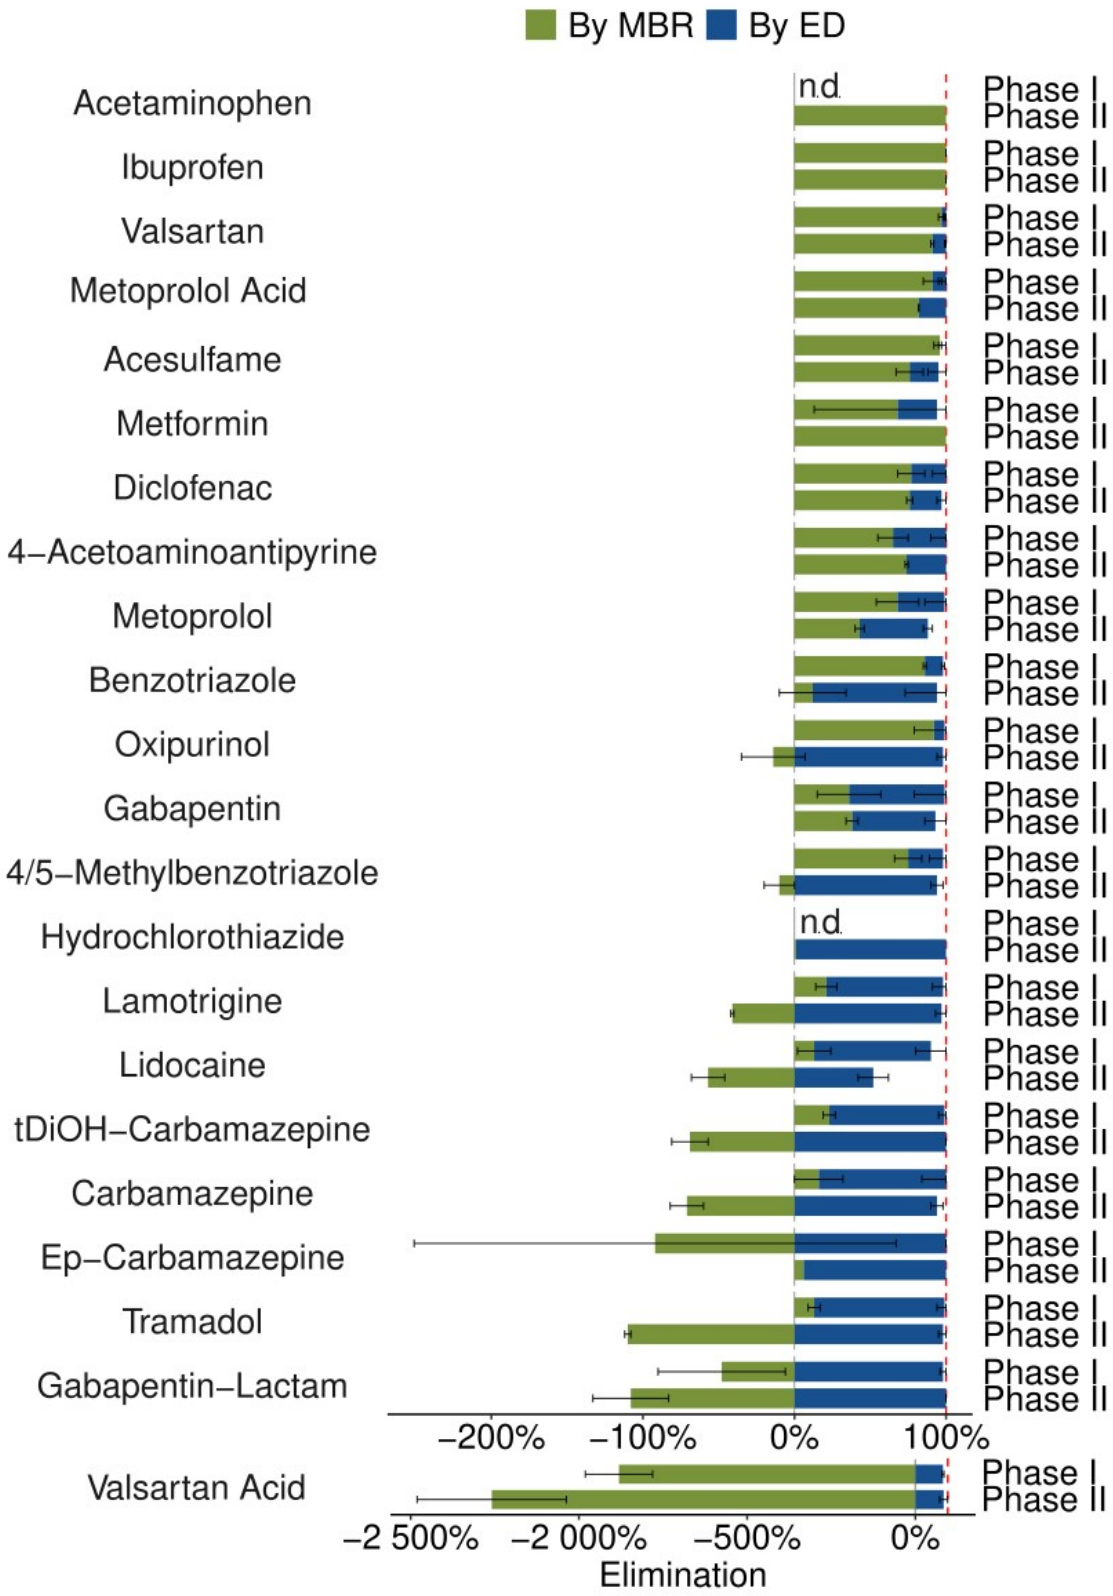

Fig. SI 1: Calculated elimination in the membrane bioreactor and the electro dialysis of organic micropollutants with strong differences between phase I and phase II for all investigated compounds. (n.d. for not determined)
